# Supplementary material
Source: PubMed Central journal article supplement (PMC9403856)
Supplement: jamadermatol-e223516-s001.pdf [file jamadermatol-e223516-s001.pdf]

## Supplemental Online Content

Chen T-L, Lee L-L, Huang H-K, Chen L-Y, Loh C-H, Chi C-C. Association of risk of venous thromboembolism with atopic dermatitis and treatment with Janus kinase inhibitors: a systematic review and meta-analysis. *JAMA Dermatol*. Published online August 24, 2022.  
doi:10.1001/jamadermatol.2022.3516

**eTable.** Search Strategies for (a) MEDLINE, (b) Embase, (c) Cochrane Library, and (d) Web of Science

**eFigure 1.** Risk Differences in Venous Thromboembolism Between Participants With Atopic Dermatitis Receiving Janus Kinase Inhibitors and Controls Receiving Placebo or Dupilumab

**eFigure 2.** Funnel Plot of Randomized Controlled Trials

This supplemental material has been provided by the authors to give readers additional information about their work.

**eTable.** Search Strategies for (a) MEDLINE, (b) Embase, (c) Cochrane Library, and (d) Web of science.

**a. Search strategy for MEDLINE**

| # | Search syntax                                                                                                                                                                                                                                                                                                                                                                                                                                                                                                                                                                                                                                                                    |
|---|----------------------------------------------------------------------------------------------------------------------------------------------------------------------------------------------------------------------------------------------------------------------------------------------------------------------------------------------------------------------------------------------------------------------------------------------------------------------------------------------------------------------------------------------------------------------------------------------------------------------------------------------------------------------------------|
| 1 | ("atopic dermatitis" or eczema*).mp.                                                                                                                                                                                                                                                                                                                                                                                                                                                                                                                                                                                                                                             |
| 2 | exp "Dermatitis, Atopic"/ or exp "Eczema"/                                                                                                                                                                                                                                                                                                                                                                                                                                                                                                                                                                                                                                       |
| 3 | (Venous adj2 thromboemboli\$).mp.                                                                                                                                                                                                                                                                                                                                                                                                                                                                                                                                                                                                                                                |
| 4 | (VTE or DVT or PE).ti,ab,kw.                                                                                                                                                                                                                                                                                                                                                                                                                                                                                                                                                                                                                                                     |
| 5 | exp "Venous Thromboembolism"/ or exp "Pulmonary Embolism"/ or exp "Embolism"/ or exp "Deep Vein Thrombosis"/                                                                                                                                                                                                                                                                                                                                                                                                                                                                                                                                                                     |
| 6 | ((Janus adj3 kinase* adj3 inhibit*) or (JAK* adj3 inhibit*) or Abrocitinib or "PF-04965842" or Baricitinib or LY3009104 or Olumiant or INCB028050 or Gusacitinib or ASN002 or Tofacitinib or Tasocitinib or "Tofacitinib citrate" or Xeljanz or CP690550 or Upadacitinib or "ABT-494" or RINVOQ or Cerdulatinib or "RVT-502" or PRT062070 or Peficitinib or ASP015K or Filgotinib or GLPG0634 or Solcitinib or "1206163-45-2" or GLPG0778 or GSK2586184 or SHR0302 or "ATI-502" or "ATI 50002" or "A 301" or "PF-06700841" or "RVT-501" or Decernotinib or "VX-509" or Pacritinib or SB1518 or Fedratinib or TG101348 or SAR302503 or "Fedratinib hydrochloride" or Inrebic).mp. |
| 7 | exp "Janus Kinase Inhibitors"/                                                                                                                                                                                                                                                                                                                                                                                                                                                                                                                                                                                                                                                   |
| 8 | (#1 OR #2) AND (#3 OR #4 OR #5)                                                                                                                                                                                                                                                                                                                                                                                                                                                                                                                                                                                                                                                  |
| 9 | (#1 OR #2) AND (#6 OR #7)                                                                                                                                                                                                                                                                                                                                                                                                                                                                                                                                                                                                                                                        |

**b. Search strategy for Embase**

| # | Search syntax                                                                                                                                                                                                                                                                                                                                                                                                                                                                                                                                                                                                                                                                    |
|---|----------------------------------------------------------------------------------------------------------------------------------------------------------------------------------------------------------------------------------------------------------------------------------------------------------------------------------------------------------------------------------------------------------------------------------------------------------------------------------------------------------------------------------------------------------------------------------------------------------------------------------------------------------------------------------|
| 1 | ("atopic dermatitis" or eczema*).mp.                                                                                                                                                                                                                                                                                                                                                                                                                                                                                                                                                                                                                                             |
| 2 | exp "atopic dermatitis"/ or exp "eczema"/                                                                                                                                                                                                                                                                                                                                                                                                                                                                                                                                                                                                                                        |
| 3 | (venous adj2 thromboemboli\$).mp.                                                                                                                                                                                                                                                                                                                                                                                                                                                                                                                                                                                                                                                |
| 4 | (VTE or DVT or PE).ti,ab,kw.                                                                                                                                                                                                                                                                                                                                                                                                                                                                                                                                                                                                                                                     |
| 5 | exp "Venous Thromboembolism"/ or exp "Pulmonary Embolism"/ or exp "Embolism"/ or exp "Deep Vein Thrombosis"/                                                                                                                                                                                                                                                                                                                                                                                                                                                                                                                                                                     |
| 6 | ((Janus adj3 kinase* adj3 inhibit*) or (JAK* adj3 inhibit*) or Abrocitinib or "PF-04965842" or Baricitinib or LY3009104 or Olumiant or INCB028050 or Gusacitinib or ASN002 or Tofacitinib or Tasocitinib or "Tofacitinib citrate" or Xeljanz or CP690550 or Upadacitinib or "ABT-494" or RINVOQ or Cerdulatinib or "RVT-502" or PRT062070 or Peficitinib or ASP015K or Filgotinib or GLPG0634 or Solcitinib or "1206163-45-2" or GLPG0778 or GSK2586184 or SHR0302 or "ATI-502" or "ATI 50002" or "A 301" or "PF-06700841" or "RVT-501" or Decernotinib or "VX-509" or Pacritinib or SB1518 or Fedratinib or TG101348 or SAR302503 or "Fedratinib hydrochloride" or Inrebic).mp. |

|   |                                 |
|---|---------------------------------|
| 7 | exp "Janus kinase inhibitor"/   |
| 8 | (#1 OR #2) AND (#3 OR #4 OR #5) |
| 9 | (#1 OR #2) AND (#6 OR #7)       |

### c. Search strategy for Cochrane Library

| # | Search syntax                                                                                                                                                                                                                                                                                                                                                                                                                                                                                                                                                                                                                                                                               |
|---|---------------------------------------------------------------------------------------------------------------------------------------------------------------------------------------------------------------------------------------------------------------------------------------------------------------------------------------------------------------------------------------------------------------------------------------------------------------------------------------------------------------------------------------------------------------------------------------------------------------------------------------------------------------------------------------------|
| 1 | ("atopic dermatitis" OR eczema*):ti,ab,kw                                                                                                                                                                                                                                                                                                                                                                                                                                                                                                                                                                                                                                                   |
| 2 | [mh "Dermatitis, Atopic "] OR [mh "Eczema"]                                                                                                                                                                                                                                                                                                                                                                                                                                                                                                                                                                                                                                                 |
| 3 | ("venous thromboembolism" OR thromboemboli*):ti,ab,kw                                                                                                                                                                                                                                                                                                                                                                                                                                                                                                                                                                                                                                       |
| 4 | [mh "Venous Thromboembolism "] OR [mh "Pulmonary Embolism"] OR [mh "Deep Vein Thrombosis"]                                                                                                                                                                                                                                                                                                                                                                                                                                                                                                                                                                                                  |
| 5 | ((Janus NEAR/2 kinase* NEAR/2 inhibit*) OR (JAK* NEAR/2 inhibit*) OR Abrocitinib OR "PF-04965842" OR Baricitinib OR LY3009104 OR Olumiant OR INCB028050 OR Gusacitinib OR ASN002 OR Tofacitinib OR Tasocitinib OR "Tofacitinib citrate" OR Xeljanz OR CP690550 OR Upadacitinib OR "ABT-494" OR RINVOQ OR Cerdulatinib OR "RVT-502" OR PRT062070 OR Peficitinib OR ASP015K OR Filgotinib OR GLPG0634 OR Solcitinib OR "1206163-45-2" OR GLPG0778 OR GSK2586184 OR SHR0302 OR "ATI-502" OR "ATI 50002" OR "A 301" OR "PF-06700841" OR "RVT-501" OR Decernotinib OR "VX-509" OR Pacritinib OR SB1518 OR Fedratinib OR TG101348 OR SAR302503 OR "Fedratinib hydrochloride" OR Inrebic):ti,ab,kw |
| 6 | [mh "Janus Kinase Inhibitors"]                                                                                                                                                                                                                                                                                                                                                                                                                                                                                                                                                                                                                                                              |
| 7 | (#1 OR #2) AND (#3 OR #4)                                                                                                                                                                                                                                                                                                                                                                                                                                                                                                                                                                                                                                                                   |
| 8 | (#1 OR #2) AND (#3 OR #4) OR (#5 OR #6)                                                                                                                                                                                                                                                                                                                                                                                                                                                                                                                                                                                                                                                     |

### d. Search strategy for Web of Science Core Collection

| # | Search syntax                                                                                                                                                                                                                                                                                                                                                                                                                                                                                                                                                                                                               |
|---|-----------------------------------------------------------------------------------------------------------------------------------------------------------------------------------------------------------------------------------------------------------------------------------------------------------------------------------------------------------------------------------------------------------------------------------------------------------------------------------------------------------------------------------------------------------------------------------------------------------------------------|
| 1 | ALL=("atopic dermatitis" OR eczema*)                                                                                                                                                                                                                                                                                                                                                                                                                                                                                                                                                                                        |
| 2 | ALL=("venous thromboembolism" OR thromboemboli*)                                                                                                                                                                                                                                                                                                                                                                                                                                                                                                                                                                            |
| 3 | TS=(Abrocitinib OR "PF-04965842" OR Baricitinib OR LY3009104 OR Olumiant OR INCB028050 OR Gusacitinib OR ASN002 OR INCA24 OR Tofacitinib OR Tasocitinib OR "Tofacitinib citrate" OR Xeljanz OR CP690550 OR Upadacitinib OR "ABT-494" OR RINVOQ OR Cerdulatinib OR "RVT-502" OR PRT062070 OR Peficitinib OR ASP015K OR Filgotinib OR GLPG0634 OR Solcitinib OR "1206163-45-2" OR GLPG0778 OR GSK2586184 OR SHR0302 OR "ATI-502" OR "ATI 50002" OR "A 301" OR "PF-06700841" OR "RVT-501" OR Decernotinib OR "VX-509" OR Pacritinib OR SB1518 OR Fedratinib OR TG101348 OR SAR302503 OR "Fedratinib hydrochloride" OR Inrebic) |
| 4 | #1 AND #2                                                                                                                                                                                                                                                                                                                                                                                                                                                                                                                                                                                                                   |
| 5 | #1 AND #2 AND #3                                                                                                                                                                                                                                                                                                                                                                                                                                                                                                                                                                                                            |

1 eFigure 1. Risk Differences in Venous Thromboembolism Between  
 2 Participants With Atopic Dermatitis Receiving Janus Kinase Inhibitors  
 3 and Controls Receiving Placebo or Dupilumab

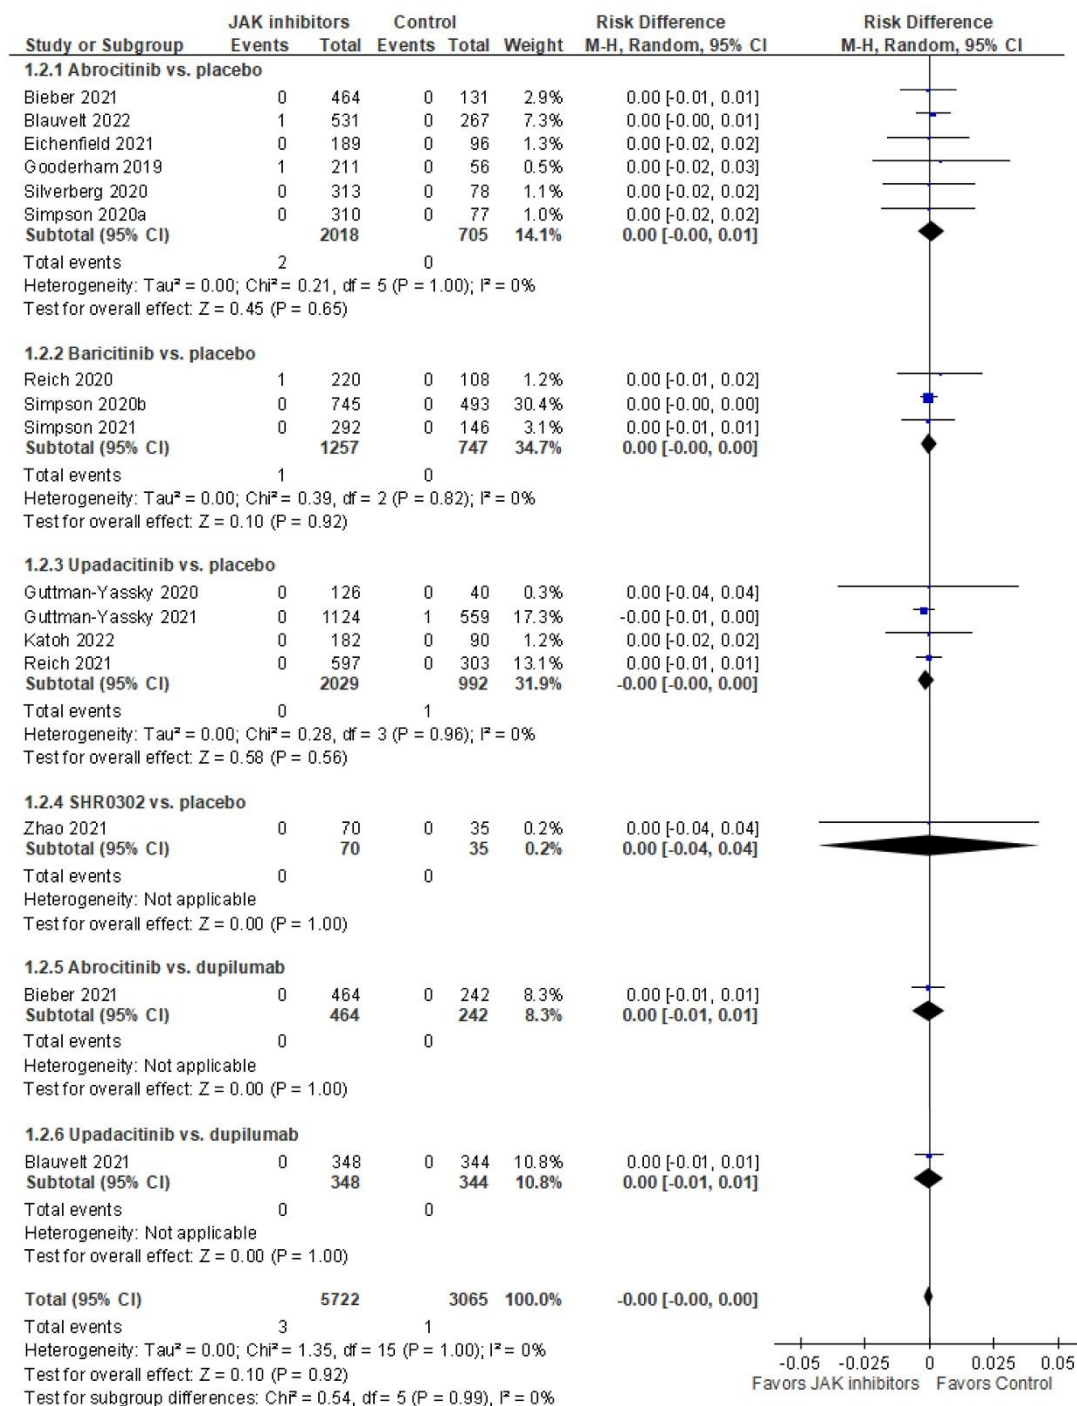

4

5 The meta-analysis found no significant difference in the risk of VTE between  
 6 participants with atopic dermatitis receiving Janus kinase inhibitors and controls  
 7 receiving placebo or dupilumab. CI, confidence interval; M-H, Mantel-Haenszel  
 8 random-effects method.

9 **eFigure 2. Funnel Plot for Randomized Controlled Trials.** No funnel plot  
10 asymmetry was indicated.

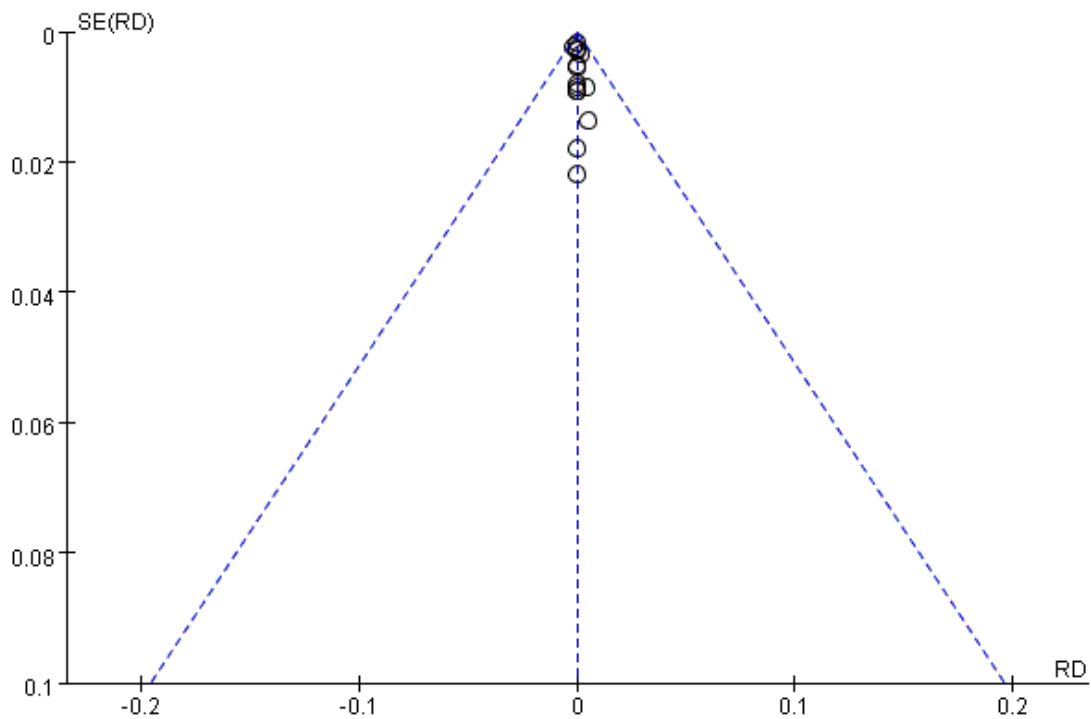

11

12 RD, risk difference; SE, standard error.
